# Supplementary material for: Effective bipolar hosts preparedviadipole moment engineering for phosphorescent emitters and white OLEDs
Source: Royal Society of Chemistry journal article supplement (doi:10.1039/d2tc04305j), 2022-01-01
Supplement: d2tc04305j1.pdf [file d2tc04305j1.pdf]

## **Effective Bipolar Host *via* Dipole Moment Engineering for Phosphorescent Emitter and White OLEDs**

Qihang Zhong,<sup>a</sup> Songkun Zeng,<sup>a</sup> Peng Fan,<sup>a</sup> Yudong Pang<sup>b</sup>, Weiguo Zhu<sup>a\*</sup>, Yafei Wang<sup>ab\*</sup>

*<sup>a</sup>Jiangsu Collaborative Innovation Center of Photovoltaic Science and Engineering, Jiangsu Engineering Laboratory of Light-Electricity-Heat Energy-Converting Materials and Applications, School of Materials Science & Engineering, Changzhou University, Changzhou 213164, China. Email: W. Zhu: [zhuwg18@126.com](mailto:zhuwg18@126.com); Y. Wang: [qiji830404@hotmail.com](mailto:qiji830404@hotmail.com)*

*<sup>b</sup>Anhui Sholon New Material Technology Co., Ltd., China*

## Contents

### Experimental part

**NMR & MS spectra (Figure S1-S11).**

**Figure S12.** TGA curves of the compounds at N<sub>2</sub> atmosphere with a heating rate of 20 °C min<sup>-1</sup>.

**Figure S13.** Fluorescence spectra of *o*-CBPy and *o*-CPPy measured in the solvents with different polarities.

**Figure S14.** Transient PL prompt of *o*-CBPy and *o*-CPPy in 10 wt% doped PMMA film at room temperature.

**Figure S15.** CV curves of compounds in CH<sub>3</sub>CN solution.

**Figure S16.** (a) The absorption spectrum of the Firpic in toluene solvent and photoluminescence (PL) spectra of *o*-CBPy or *o*-CPPy in 10 wt% PMMA films; (b) the PL spectrums of hosts and emitters in toluene solvent.

**Figure S17.** The chemical structures of the corresponding materials; device configurations of (b) Firpic and Ir(mppy)<sub>3</sub>, (c) W1.

**Figure S18.** The EL performance of Firpic based on *o*-CBPy and *o*-CPPy.

**Figure S19.** The EL performance of WOLED.

**Figure S20.** The EL spectra of WOLED at different voltages.

**Table S1.** Crystal data of compounds (All crystals were obtained via slow evaporation of a CHCl<sub>3</sub>/methanol (v:v/1:1) mixture solvent).

**Table S2.** EL Performance Comparison of Firpic-Based PhOLEDs Containing Various Host Materials Reported in this Work and in the Literature.

## *Experimental part*

Except for carbazole, which was synthesized by ourselves, other materials were purchased from Energy Chemical Company Ltd. and used directly for the reaction. All reactions were carried out under N<sub>2</sub> atmosphere. To determine the structure of the compound, <sup>1</sup>H NMR and <sup>13</sup>C NMR spectra were obtained using a Bruker Dex-300/400 NMR instrument using CDCl<sub>3</sub> or DMSO as solvent. Mass spectra (MS) were recorded on a Bruker Autoflex MALDI-TOF instrument using dithranol as a matrix.

To investigate the possibility of using the material as a fully evaporated OLED emitter, thermogravimetric analysis (TGA) was performed using a NETZSCH STA449 at a heating rate of 20°C/min under N<sub>2</sub> atmosphere from 30°C to 600°C. Differential Scanning Calorimetry (DSC) measures heating and cooling at a rate of 10 °C min<sup>-1</sup> at the phase transition temperature.

UV-Vis absorption spectra and steady-state photoluminescence (PL) spectra of the two host materials were obtained at room temperature using a Shimadzu UV-1650PC and a PTI QuantaMaster 40 steady-state fluorescence spectrometer. Low temperature (77 K) fluorescence and phosphorescence spectra were measured in toluene solution (10<sup>-5</sup> M) using an Edinburgh FLS920 transient fluorescence spectrophotometer.

Electrochemical performance was evaluated by cyclic voltammetry using a 273A (Princeton Applied Research) in degassed CH<sub>3</sub>CN solution at a rate of 100 mV/s. The CV system uses Bu<sub>4</sub>NPF<sub>6</sub> as the electrolyte. The platinum disk is the working electrode, the platinum wire is the counter electrode, and the silver wire is the

reference electrode. Ferrocene/Ferrocene ( $\text{Fc}/\text{Fc}^+$ ) was used as the external standard compound. Each oxidation potential was calibrated using ferrocene as a reference.

## Synthesis

*Synthesis of compounds 1:* A mixture of 3-Bromo-2-fluoropyridine (5 g, 28.4 mmol), Bis(pinacolato)diboron (8.7 g, 34.1 mmol), Pd(dppf)Cl<sub>2</sub> (208 mg, 0.28 mmol), KOAc (8.4 g, 85 mmol) and 60 mL Toluene was heated to 80 °C under a nitrogen atmosphere and refluxed for 24 hours. After the reaction stopped, Tol was removed by vacuum distillation; The remaining mixture was extracted with CH<sub>2</sub>Cl<sub>2</sub> (3 × 50 mL), washed with water and dried over anhydrous MgSO<sub>4</sub>. The product was purified by column chromatography on silica (PE/EA, 6:1, v/v) to give a yellow liquid. (5.8 g, yield 91 %). <sup>1</sup>H NMR (400 MHz, CDCl<sub>3</sub>) δ 8.34 - 8.27 (m, 1H), 8.21 - 8.14 (m, 1H), 7.19 (ddd, *J* = 7.3, 4.9, 2.6 Hz, 1H), 1.37 (s, 12H). (**Figure S1**).

*Synthesis of compounds 2 and 3:* A mixture of SM1 (4 g, 17.9 mmol), 3-Bromo-2-fluoropyridine (3.14 g, 17.9 mmol) or 2-Bromofluorobenzene (3.2 g, 17.9 mmol), Pd(pph<sub>3</sub>)<sub>4</sub> (206 mg, 0.18 mmol), K<sub>2</sub>CO<sub>3</sub> (10 g, 72.5 mmol) and 60 mL Tetrahydrofuran and 15 mL water was heated to 80 °C under a nitrogen atmosphere and refluxed for 24 hours. After the reaction stopped, the mixture was extracted with CH<sub>2</sub>Cl<sub>2</sub> (3 × 50 mL), washed with water and dried over anhydrous MgSO<sub>4</sub>. The product was purified by column chromatography on silica (PE/EA, 8:1, v/v) to give a white solid. 2: (1.7 g, yield 48 %), 3: (1.83 g, yield 53 %).

2: <sup>1</sup>H NMR (400 MHz, DMSO) δ 8.37 (d, *J* = 4.4 Hz, 2H), 8.17 (dd, *J* = 11.0, 5.5 Hz, 2H), 7.58 - 7.52 (m, 2H). <sup>13</sup>C NMR (101 MHz, CDCl<sub>3</sub>) δ 161.52, 159.12, 148.21, 147.78, 141.91, 121.79, 121.50, 116.72, 116.47. (**Figure S2, S3**).

3:  $^1\text{H}$  NMR (400 MHz,  $\text{CDCl}_3$ )  $\delta$  8.26 (d,  $J = 4.7$  Hz, 1H), 7.86 (t,  $J = 8.4$  Hz, 1H), 7.42 (dd,  $J = 12.5, 5.5$  Hz, 2H), 7.32 - 7.28 (m, 1H), 7.26 - 7.16 (m, 2H).  $^{13}\text{C}$  NMR (101 MHz,  $\text{CDCl}_3$ )  $\delta$  161.70, 161.04, 159.31, 158.56, 147.19, 142.04, 131.38, 130.59, 124.34, 121.44, 118.60, 118.29, 116.17, 115.95. (**Figure S4, S5**).

*Synthesis of compound o-CBPy and o-CPPy*: A mixture of compound Carbazole (4.17 g, 10.4 mmol), sodium hydride (0.42 g, 10.4 mmol) in 15 mL dry N,N-Dimethylformamide was stirred for 0.5 h at 50 °C. After adding 2 (0.8 g, 4.2 mmol) or 3 (0.8 g, 4.2 mmol), the mixture was stirred for 24 h at 140 °C and poured into water (120 mL), which was extracted with ethyl acetate (3  $\times$  30 mL). The organic phase was washed with water (200 mL) and concentrated under vacuum. The crude product was purified by flash chromatography (EA/PE, 1/6) to get white solid. *o*-CBPy: (0.9 g, yield 44 %), *o*-CPPy: (0.8 g, yield 39 %).

*o*-CBPy:  $^1\text{H}$  NMR (400 MHz,  $\text{CDCl}_3$ )  $\delta$  8.50 (d,  $J = 4.5$  Hz, 2H), 8.29 (d,  $J = 7.7$  Hz, 2H), 7.66 - 7.48 (m, 6H), 6.93 (dt,  $J = 15.0, 7.1$  Hz, 8H), 6.33 (d,  $J = 5.4$  Hz, 4H).  $^{13}\text{C}$  NMR (126 MHz,  $\text{CDCl}_3$ )  $\delta$  149.29, 148.18, 142.23, 130.14, 124.96, 124.49, 122.73, 120.15, 119.56, 110.49. MALDI-MS ( $m/z$ ) of  $\text{C}_{34}\text{H}_{22}\text{N}_4$  for  $[\text{M}]^+$ : calcd. 486.58; found, 486.11. (**Figure S6, S7, S8**).

*o*-CPPy:  $^1\text{H}$  NMR (400 MHz,  $\text{CDCl}_3$ )  $\delta$  8.47 - 8.39 (m, 1H), 8.25 (d,  $J = 7.8$  Hz, 1H), 7.93 (d,  $J = 7.7$  Hz, 1H), 7.73 - 7.56 (m, 5H), 7.46 (dd,  $J = 7.5, 5.2$  Hz, 1H), 7.37 (t,  $J = 7.6$  Hz, 1H), 7.11 (d,  $J = 7.9$  Hz, 1H), 7.03 - 6.78 (m, 8H), 6.33 (d,  $J = 73.6$  Hz, 4H).  $^{13}\text{C}$  NMR (101 MHz,  $\text{CDCl}_3$ )  $\delta$  148.68, 142.72, 139.68, 139.14, 136.06, 135.82, 133.25, 132.09, 129.62, 129.07, 128.38, 125.02, 124.44, 123.87, 122.65, 120.00,

119.67, 110.77, 109.66. MALDI-MS (m/z) of  $C_{35}H_{23}N_3$  for  $[M]^+$ : calcd. 485.59; found, 485.09. (Figure S9, S10, S11).

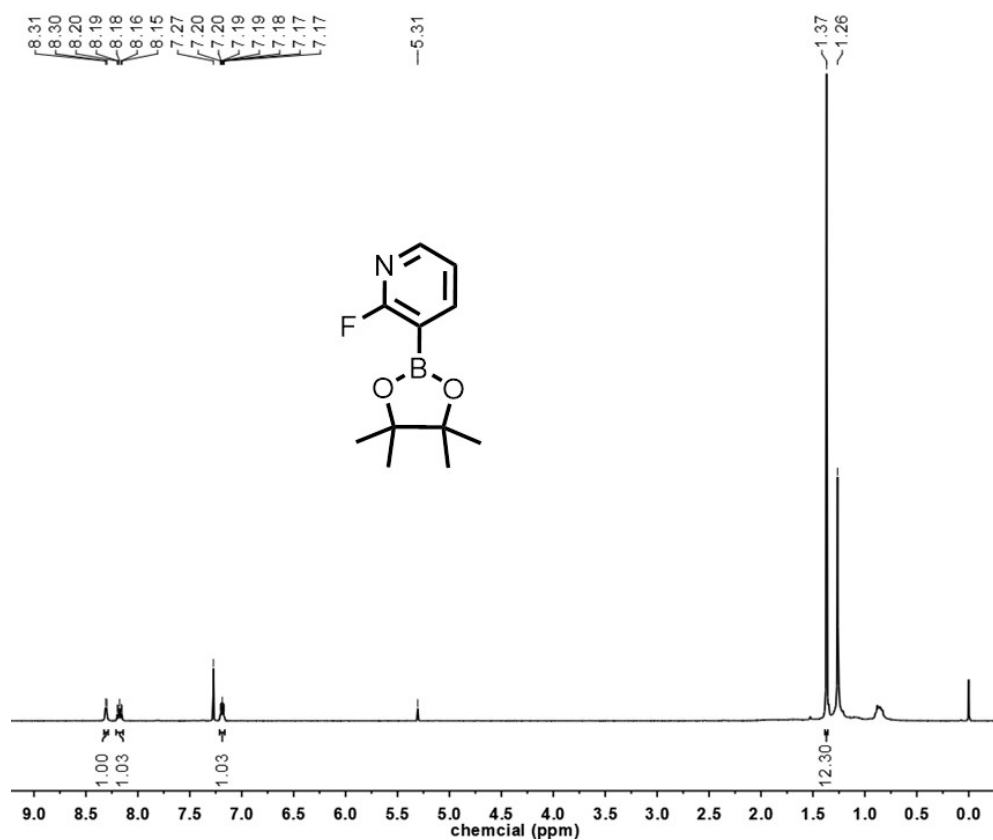

Figure S1.  $^1H$  NMR spectrum of 1 in  $CDCl_3$ .

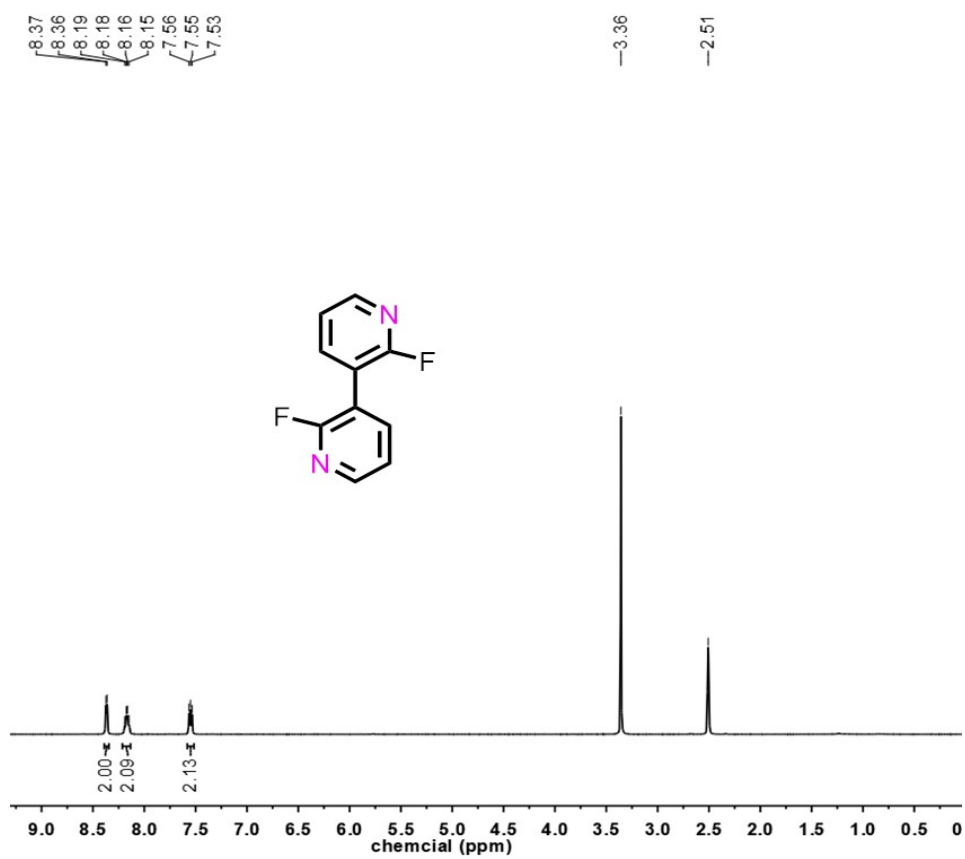

Figure S2. <sup>1</sup>H NMR spectrum of 2 in DMSO.

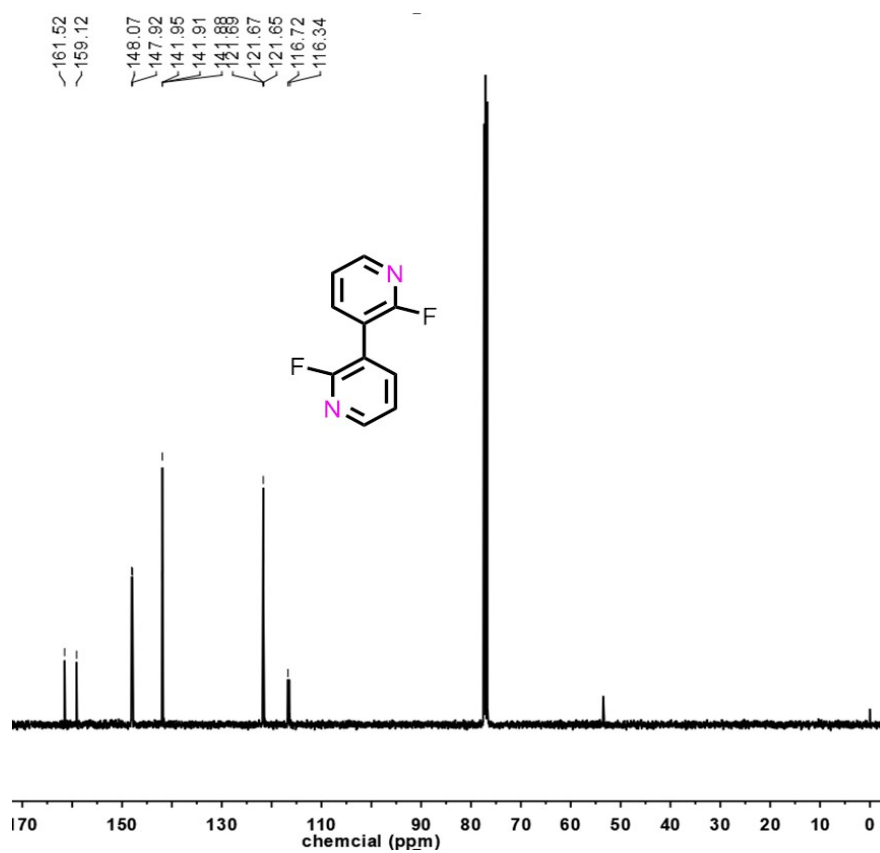

Figure S3. <sup>13</sup>C NMR spectrum of 2 in CDCl<sub>3</sub>.



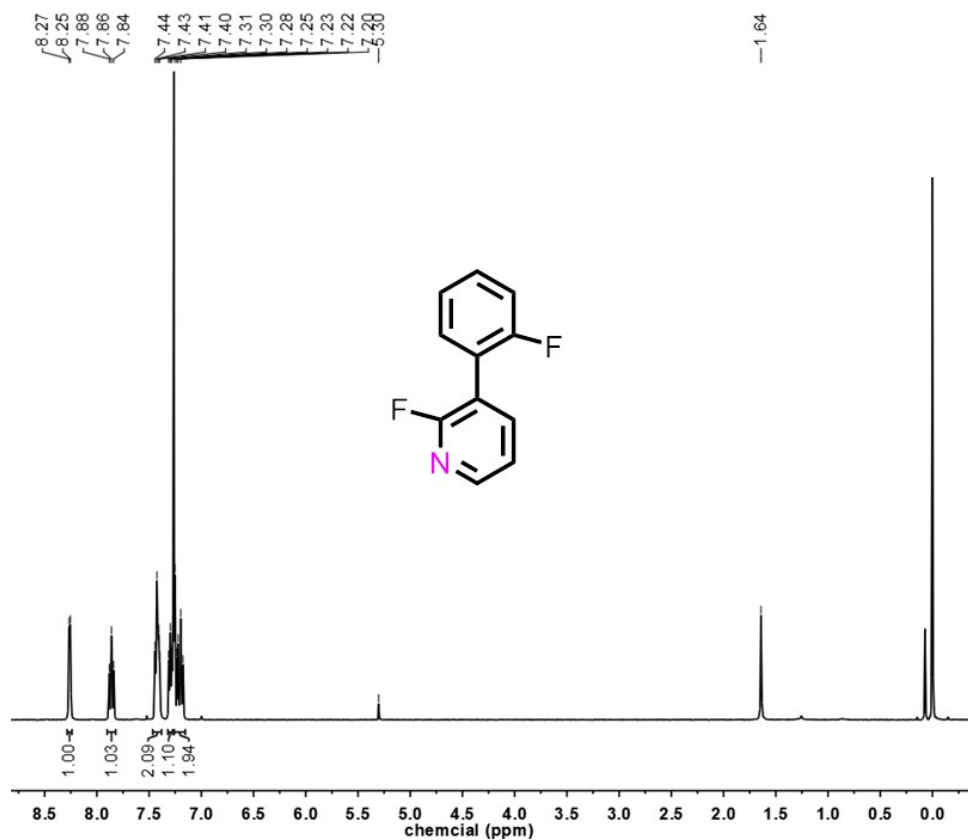

Figure S4. <sup>1</sup>H NMR spectrum of 3 in CDCl<sub>3</sub>.

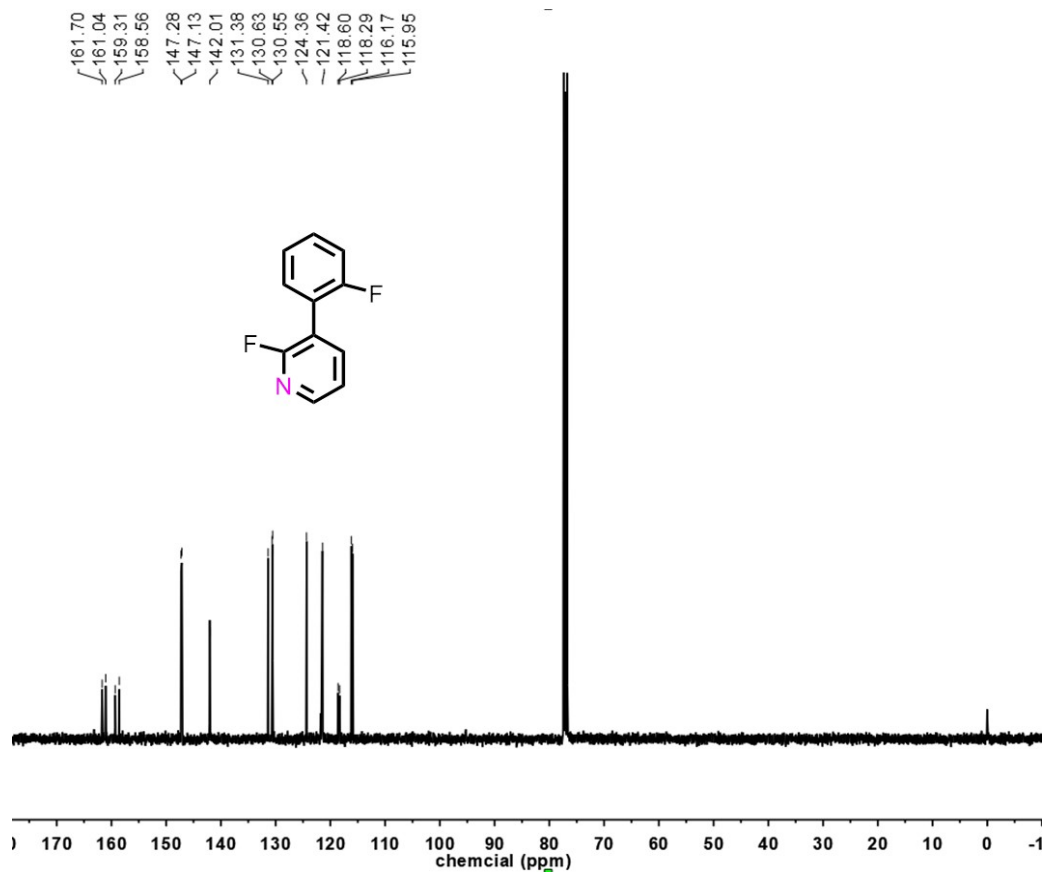

Figure S5. <sup>13</sup>C NMR spectrum of 3 in CDCl<sub>3</sub>.

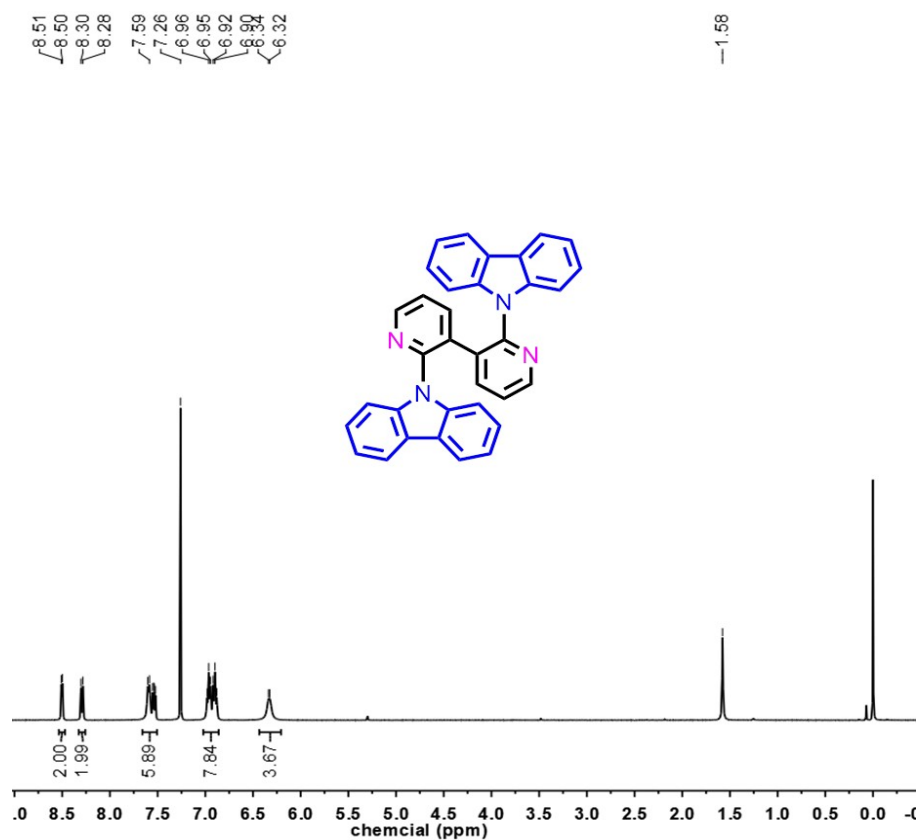

Figure S6. <sup>1</sup>H NMR spectrum of *o*-CBPy in CDCl<sub>3</sub>.

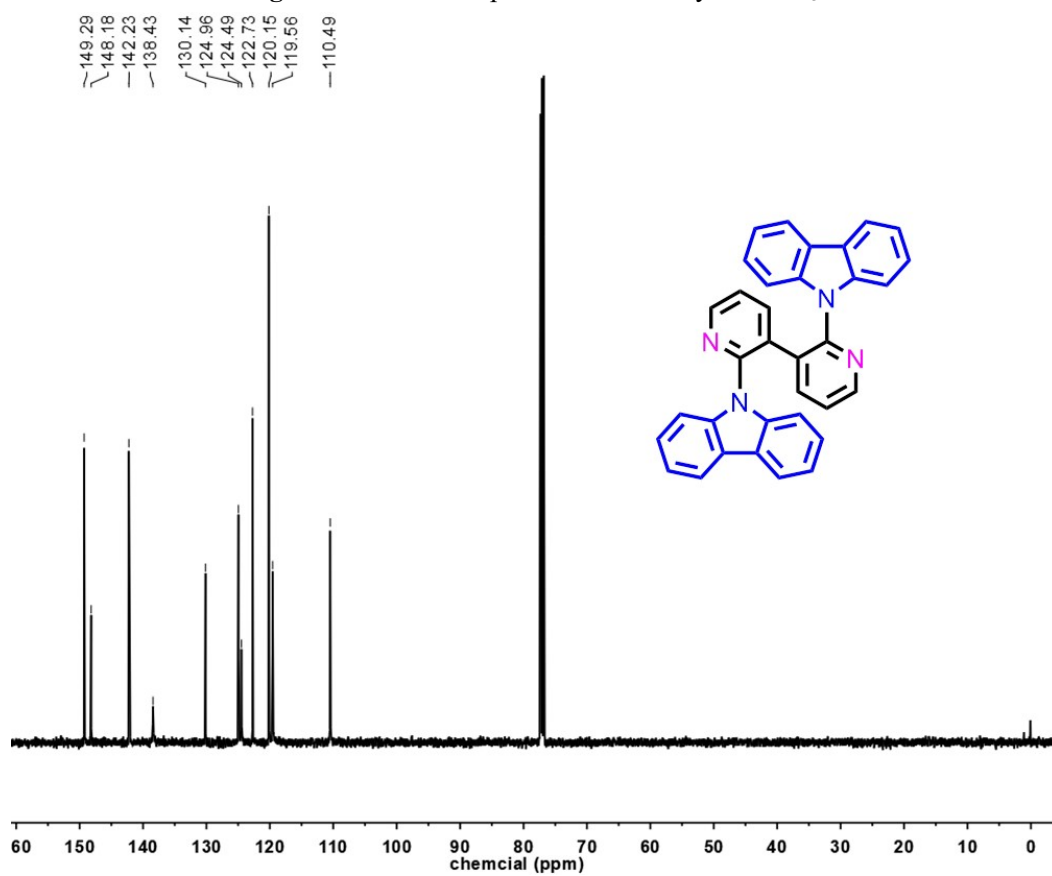

Figure S7. <sup>13</sup>C NMR spectrum of *o*-CBPy in CDCl<sub>3</sub>.

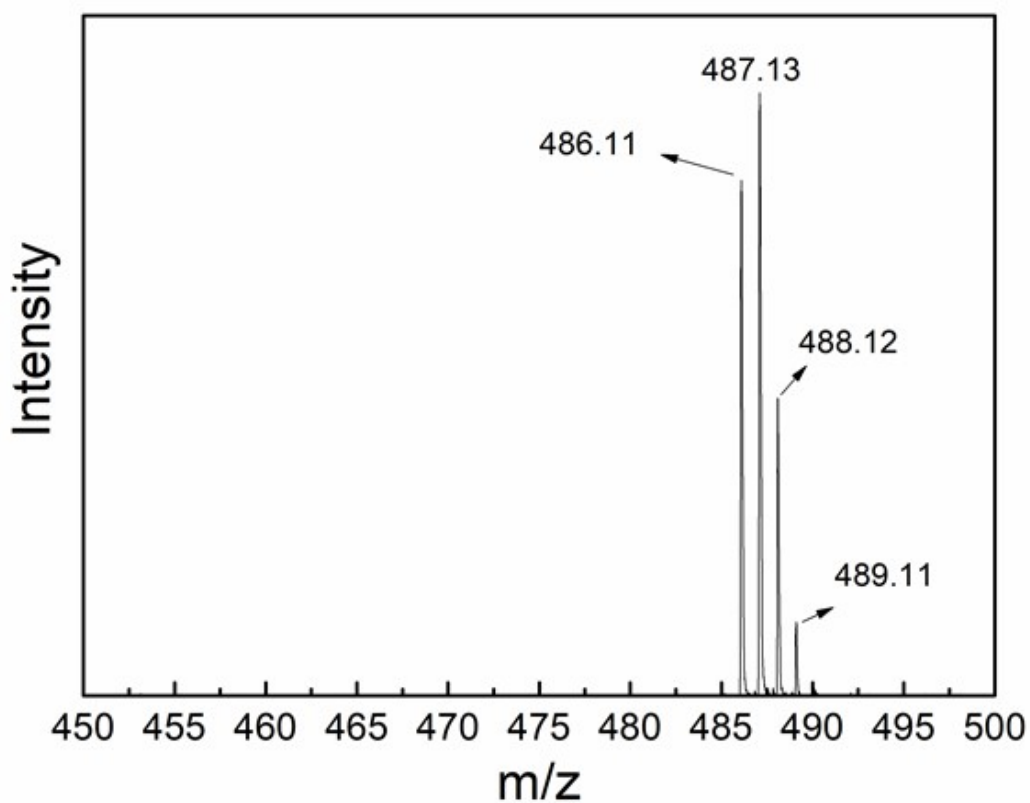

Figure S8. Mass spectrum of *o*-CBPy.

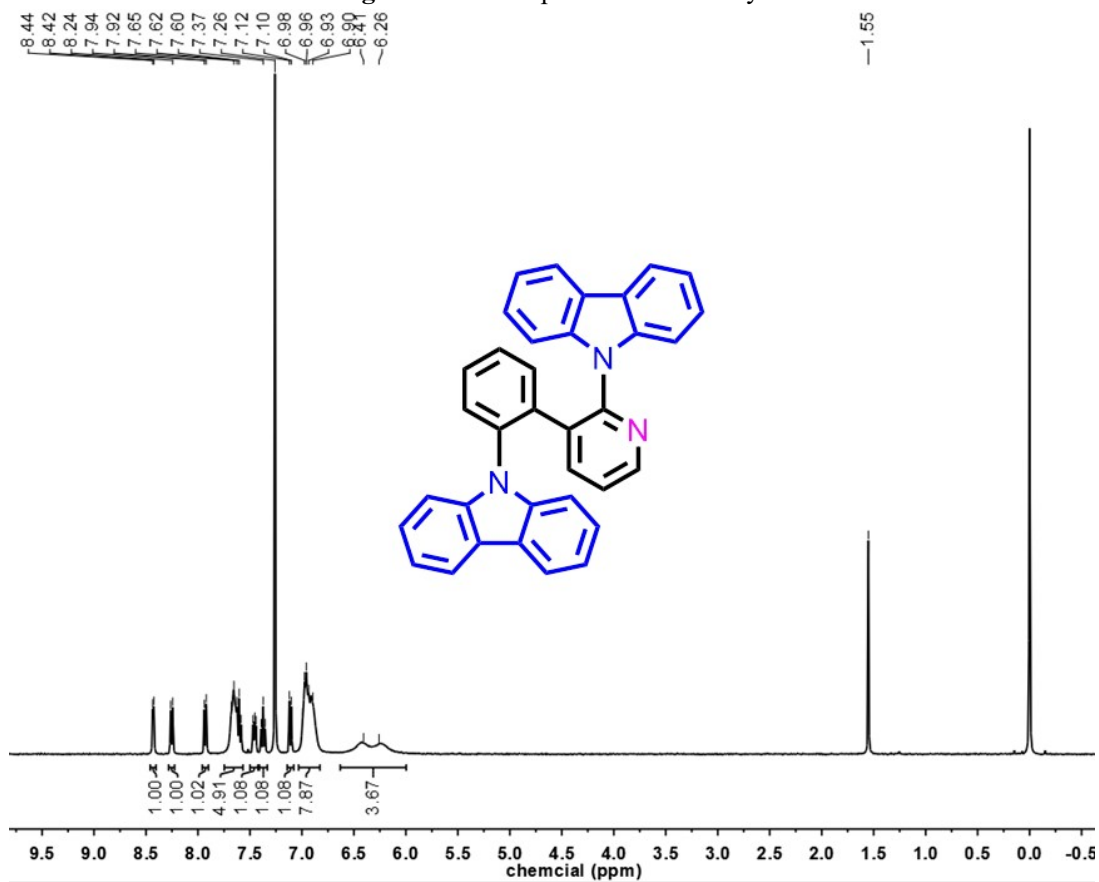

Figure S9. <sup>1</sup>H NMR spectrum of *o*-CPy in CDCl<sub>3</sub>.

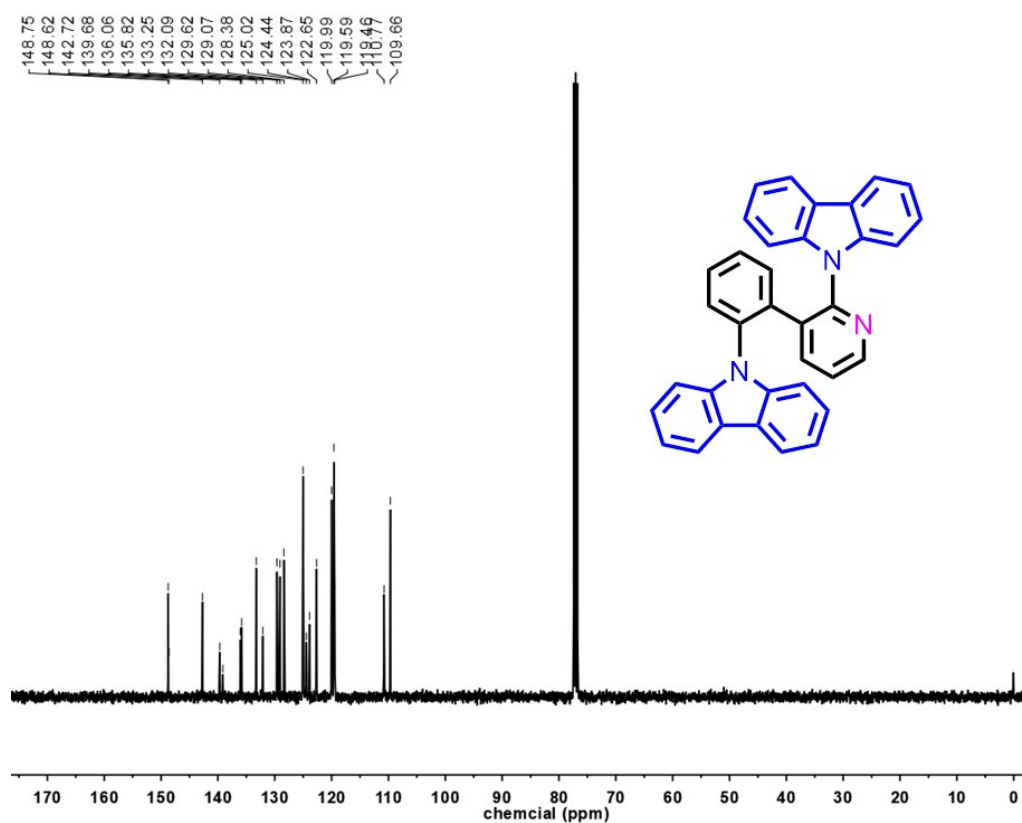

Figure S10.  $^{13}\text{C}$  NMR spectrum of *o*-CPPy in  $\text{CDCl}_3$ .

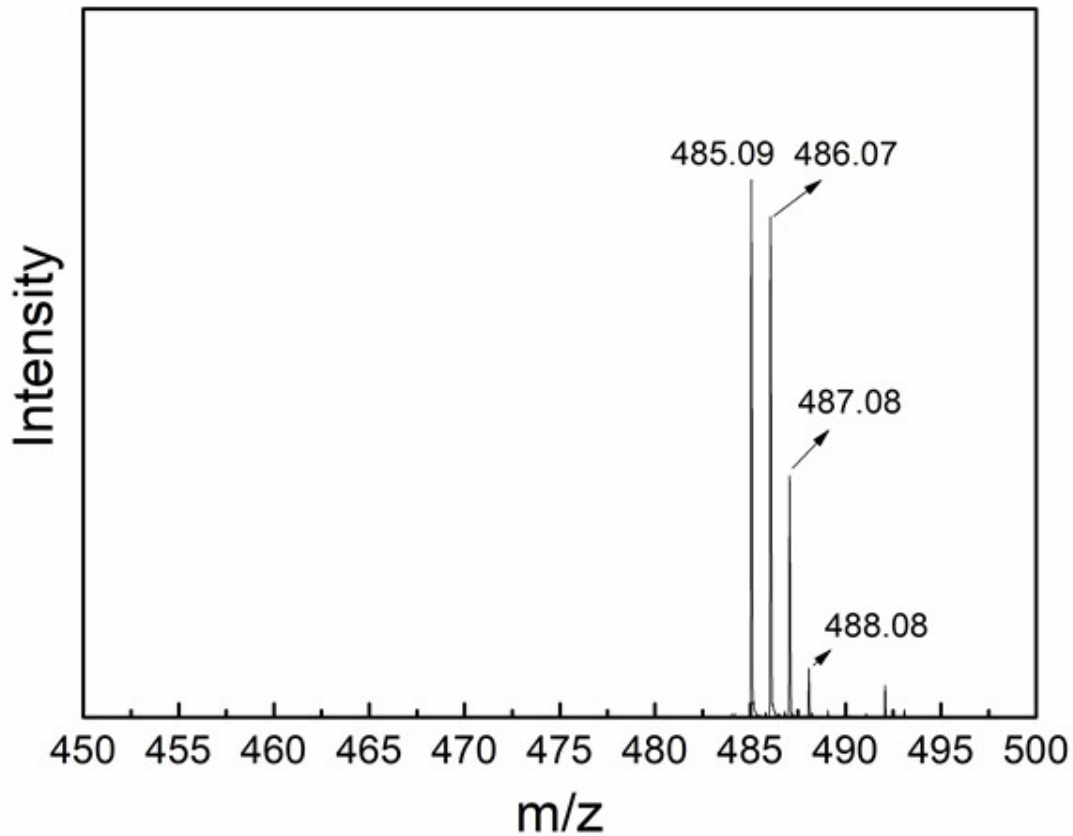

Figure S11. Mass spectrum of *o*-CPPy.

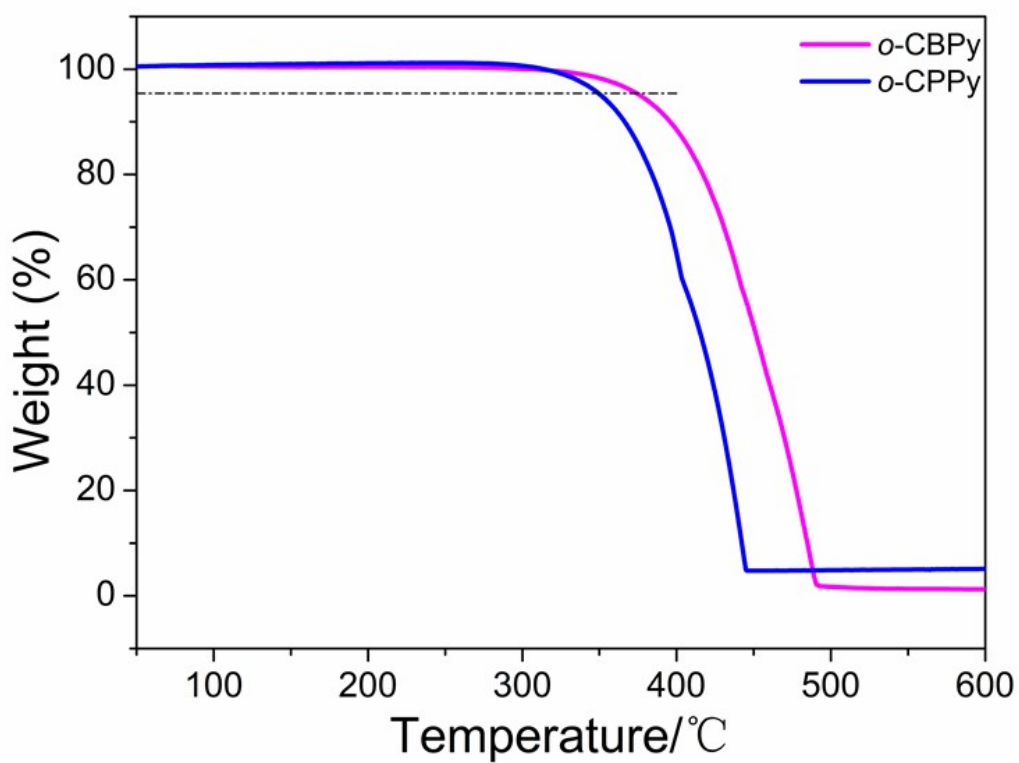

Figure S12. TGA curves of the compounds at N<sub>2</sub> atmosphere with a heating rate of 20 °C min<sup>-1</sup>.

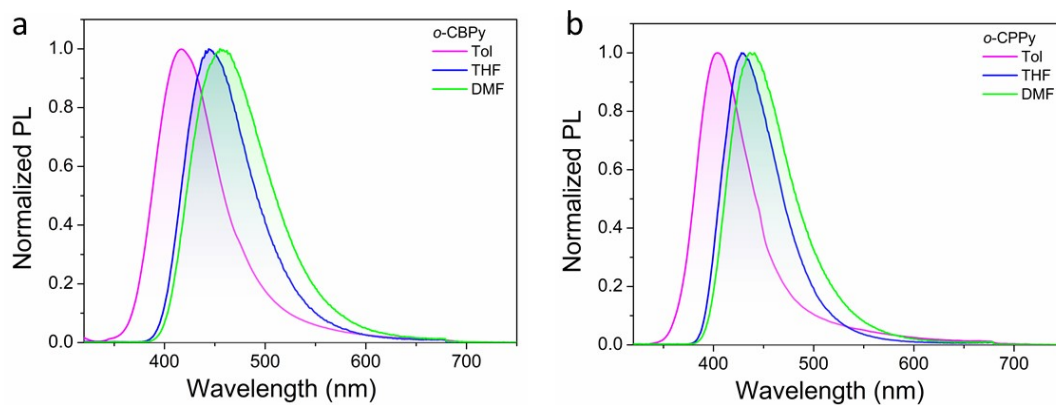

Figure S13. Fluorescence spectra of *o*-CBPpy and *o*-CPPy measured in the solvents with different polarities.

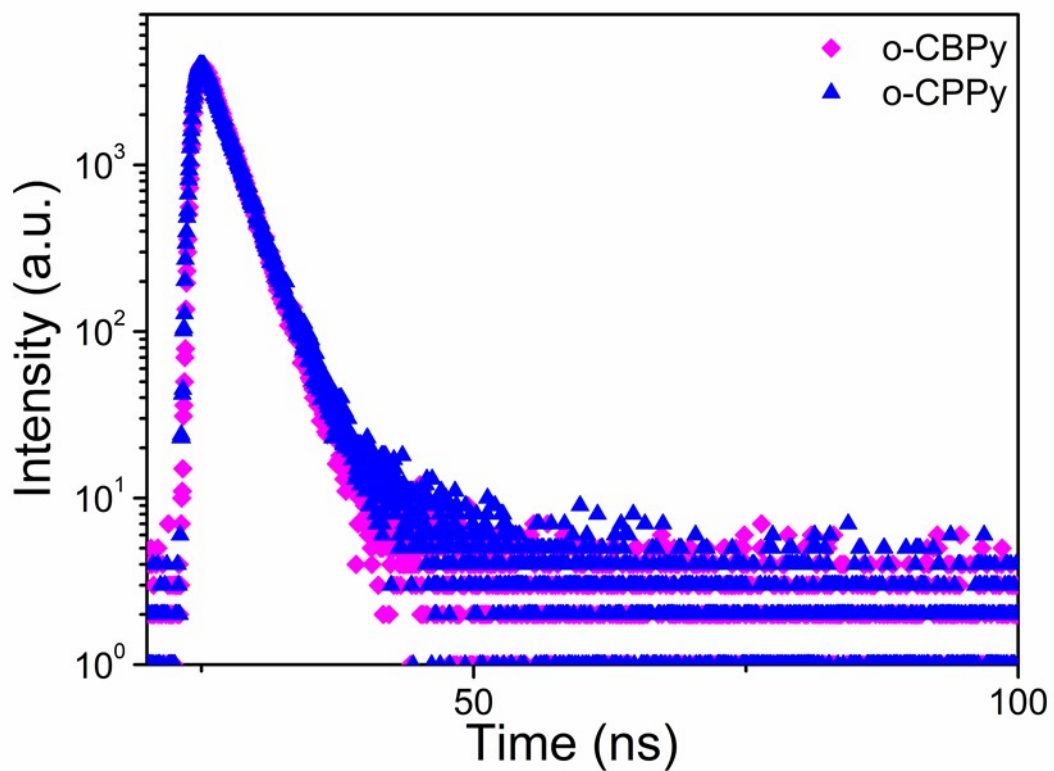

**Figure S14.** Transient PL prompt of *o*-CBPy and *o*-CPPy in 10 wt% doped PMMA film at room temperature.

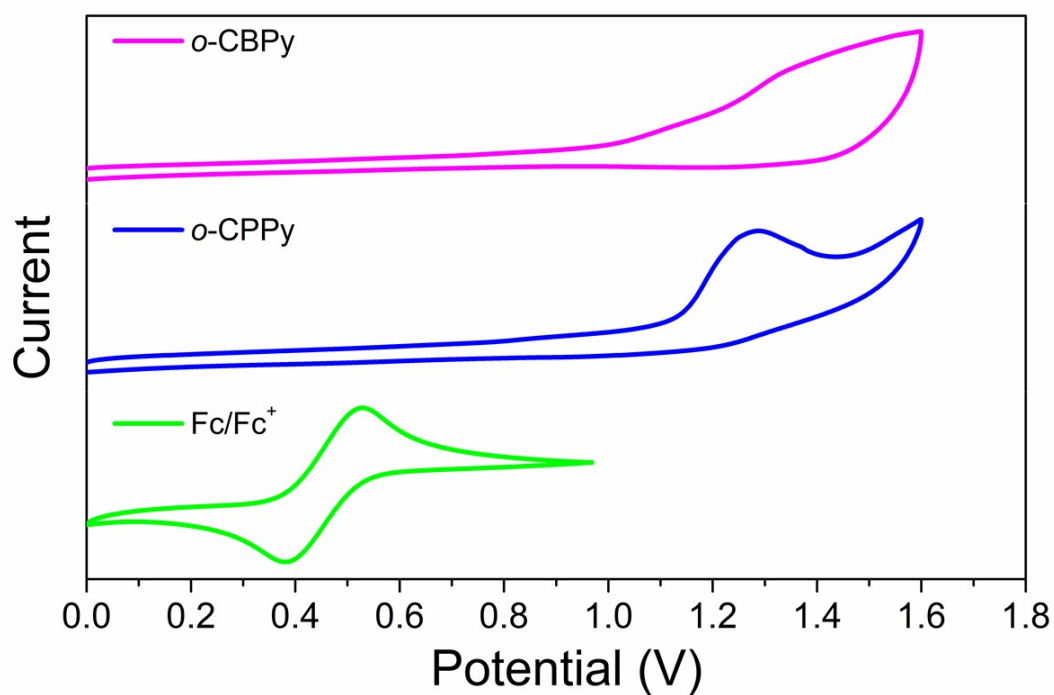

**Figure S15.** CV curves of compounds in CH<sub>3</sub>CN solution.

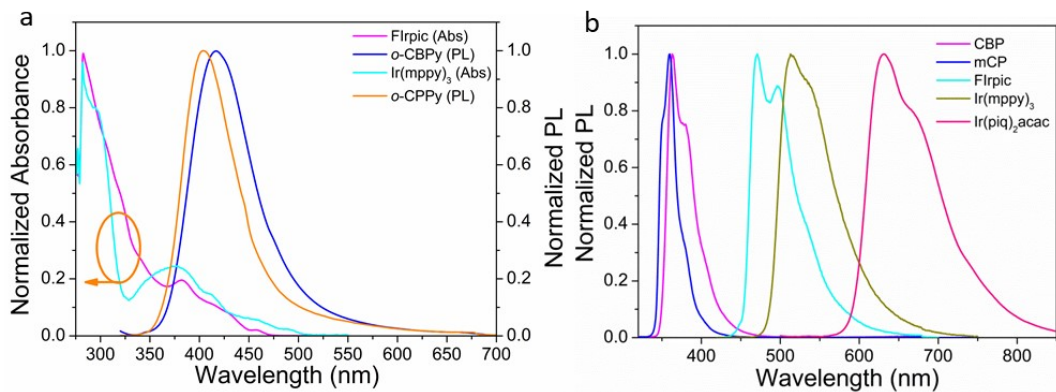

**Figure S16.** (a) The absorption spectrum of the Firpic and Ir(mppy)<sub>3</sub> in toluene solvent and photoluminescence (PL) spectra of *o*-CBPy or *o*-CPPy in 10 wt% PMMA films; (b) the PL spectrums of hosts and emitters in toluene solvent..

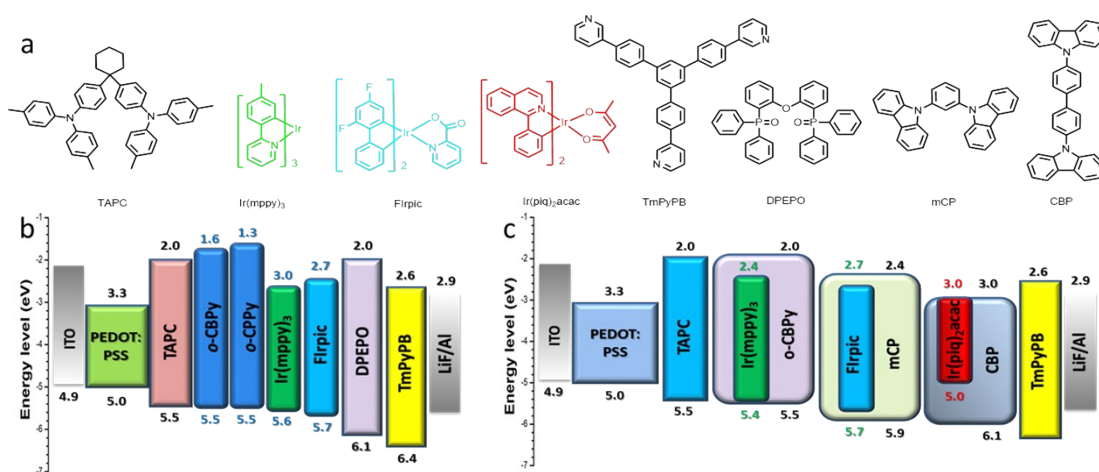

**Figure S17.** (a) The chemical structures of the corresponding materials; device configurations of (b) Firpic and Ir(mppy)<sub>3</sub>, (c) W1.



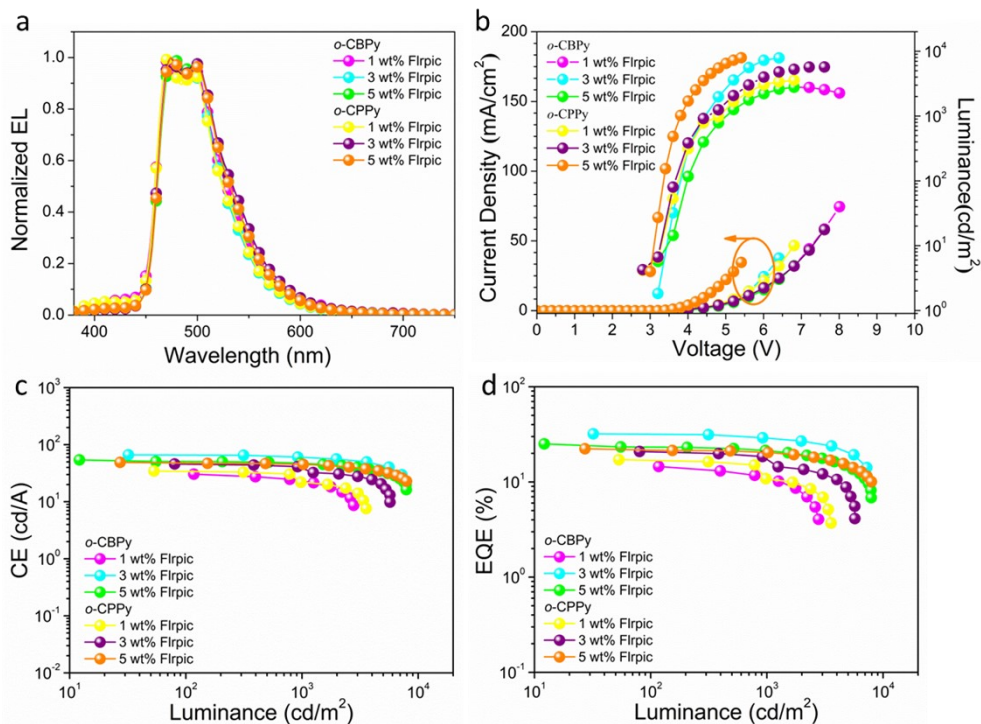

**Figure S18.** The EL performance of Flrpic based on *o*-CBPy and *o*-CPPy.

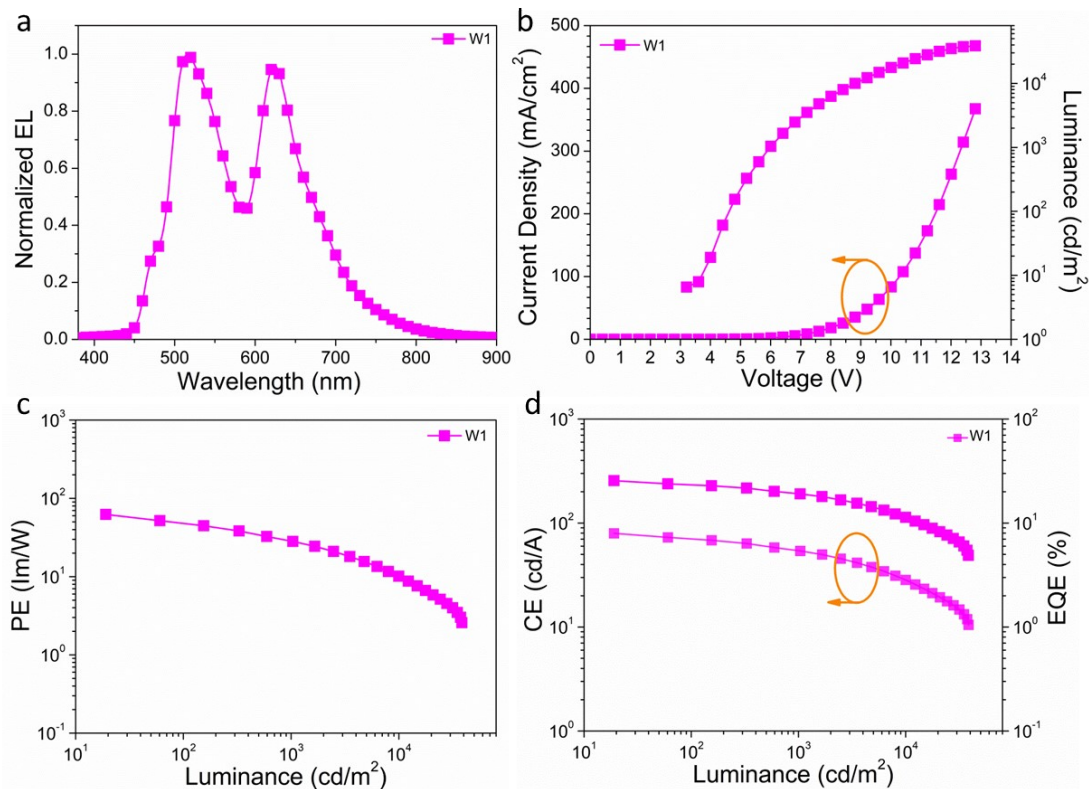

**Figure S19.** The EL performance of white device.



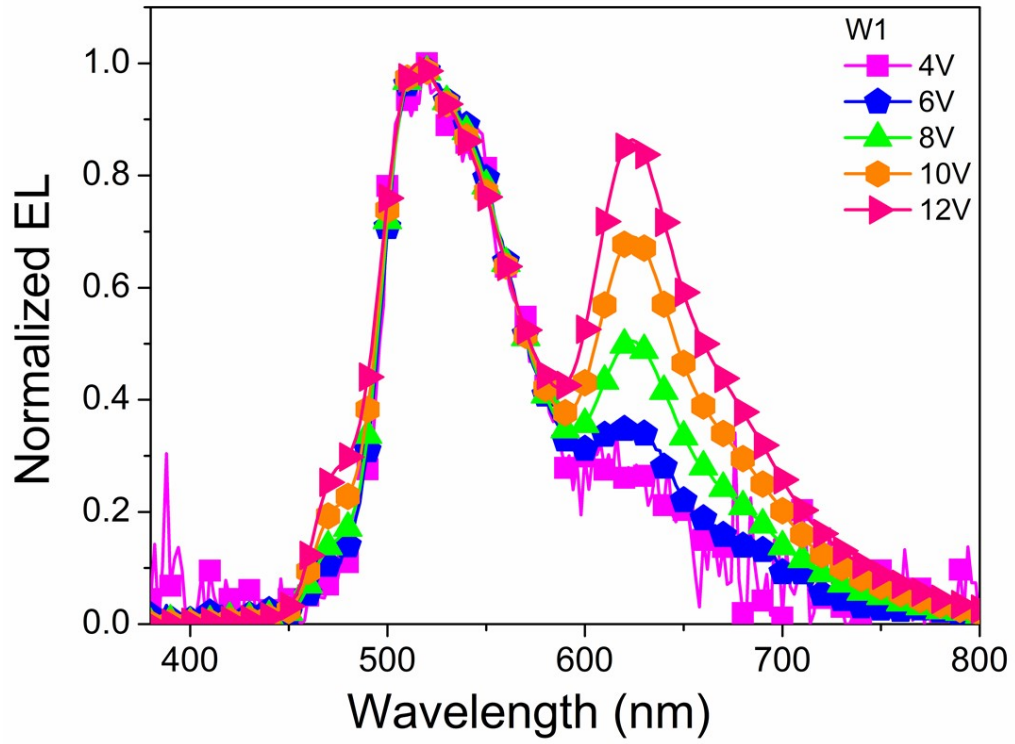

**Figure S20.** The EL spectra of white device at different voltages.

**Table S1.** Crystal data of compounds (All crystals were obtained via slow evaporation of a CHCl<sub>3</sub>/methanol (v:v/1:1) mixture solvent).

| Identification code                                   | <i>o</i> -CBPy                                                | <i>o</i> -CPPy                                                |
|-------------------------------------------------------|---------------------------------------------------------------|---------------------------------------------------------------|
| Empirical formula                                     | C <sub>34</sub> H <sub>22</sub> N <sub>4</sub>                | C <sub>35</sub> H <sub>23</sub> N <sub>3</sub>                |
| Formula weight                                        | 486.55                                                        | 485.56                                                        |
| Temperature/K                                         | 150.0                                                         | 170.0                                                         |
| Crystal system                                        | monoclinic                                                    | monoclinic                                                    |
| Space group                                           | Cc                                                            | Cc                                                            |
| <i>a</i> /Å                                           | 10.4058 (6)                                                   | 10.5020(7)                                                    |
| <i>b</i> /Å                                           | 17.8601(9)                                                    | 17.3495(12)                                                   |
| <i>c</i> /Å                                           | 13.3858(6)                                                    | 13.9993(13)                                                   |
| $\alpha$ /°                                           | 90                                                            | 90                                                            |
| $\beta$ /°                                            | 98.342(10)                                                    | 97.443(2)                                                     |
| $\gamma$ /°                                           | 90                                                            | 90                                                            |
| Volume/Å <sup>3</sup>                                 | 2461.4(2)                                                     | 2529.3(3)                                                     |
| <i>Z</i>                                              | 4                                                             | 4                                                             |
| $\rho_{\text{calc}}/\text{cm}^3$                      | 1.313                                                         | 1.275                                                         |
| $\mu/\text{mm}^{-1}$                                  | 0.079                                                         | 0.075                                                         |
| F(000)                                                | 1016.0                                                        | 1016.0                                                        |
| Crystal size/mm <sup>3</sup>                          | 0.15 × 0.08 × 0.06                                            | 0.15 × 0.08 × 0.05                                            |
| Radiation                                             | MoK $\alpha$ ( $\lambda$ = 0.71073)                           | MoK $\alpha$ ( $\lambda$ = 0.71073)                           |
| 2 $\Theta$ range for data collection/°                | 4.562 to 52.802                                               | 4.562 to 52.814                                               |
| Index ranges                                          | -12 ≤ <i>h</i> ≤ 12, -22 ≤ <i>k</i> ≤ 22, -13 ≤ <i>l</i> ≤ 16 | -13 ≤ <i>h</i> ≤ 13, -21 ≤ <i>k</i> ≤ 21, -17 ≤ <i>l</i> ≤ 16 |
| Reflections collected                                 | 12188                                                         | 9490                                                          |
| Independent reflections                               | 4312 [R <sub>int</sub> = 0.0660, R <sub>sigma</sub> = 0.0740] | 4154 [R <sub>int</sub> = 0.0599, R <sub>sigma</sub> = 0.0753] |
| Data/restraints/parameters                            | 4312/2/343                                                    | 4154/2/343                                                    |
| Goodness-of-fit on F <sup>2</sup>                     | 1.098                                                         | 1.052                                                         |
| Final R indexes [ <i>I</i> ≥ 2 $\sigma$ ( <i>I</i> )] | R <sub>1</sub> = 0.0508, wR <sub>2</sub> = 0.0960             | R <sub>1</sub> = 0.0607, wR <sub>2</sub> = 0.1218             |
| Final R indexes [all data]                            | R <sub>1</sub> = 0.0828, wR <sub>2</sub> = 0.1139             | 1R <sub>1</sub> = 0.1122, wR <sub>2</sub> = 0.1512            |
| Largest diff. peak/hole / e Å <sup>-3</sup>           | 0.20/-0.22                                                    | 0.17/-0.21                                                    |

**Table S2.** EL Performance Comparison of FIrpic-Based PhOLEDs Containing Various Host Materials Reported in this Work and in the Literature.

| Host type          | Host                 | CE(cd/A)    | PE(lm/W)    | EQE/%       | CIE(x,y)           | Reference        |    |
|--------------------|----------------------|-------------|-------------|-------------|--------------------|------------------|----|
| Conventional hosts | <b><i>o</i>-CBPy</b> | <b>66.4</b> | <b>57.9</b> | <b>32.0</b> | <b>(0.16,0.36)</b> | <b>This work</b> |    |
|                    | <b><i>o</i>-CPPy</b> | <b>48.9</b> | <b>47.9</b> | <b>22.3</b> | <b>(0.17,0.38)</b> |                  |    |
|                    | <i>o</i> -PyCNBCz    | 61.7        | 56.2        | 34.6        | (0.14,0.29)        | 19               |    |
|                    | <i>m</i> -POPyCz     | 51.9        | 46.5        | 27.0        | (0.14, 0.31)       | 20               |    |
|                    | <i>o</i> -CzTP       | 52.3        | 40.5        | 27.1        | (0.15,0.34)        | 21               |    |
|                    | 4-CbzBiz             | 64.1        | 66.3        | 30.9        | -                  | 22               |    |
|                    | CzBPCb               | 53.6        | 50.6        | 30.1        | -                  | 23               |    |
|                    | CbOTCb               | 47.4        | 44.0        | 28.8        | (0.14,0.30)        | 24               |    |
|                    | <i>o</i> -DiCzbzBz   | 57.5        | 48.9        | 27.0        | -                  | 25               |    |
|                    | <i>m</i> CPCN        | 67.8        | 73.4        | 30.6        | (0.16,0.36)        | 26               |    |
|                    | PCPO25               | -           | 53.1        | 31.4        | -                  | 27               |    |
|                    | DCzCO                | 63.7        | 53.3        | 31.2        | (0.16,0.34)        | 28               |    |
|                    | TADF hosts           | BT-01       | 73.5        | 64.4        | 31.8               | (0.16,0.36)      | 29 |
|                    |                      | BT-02       | 78.8        | 64.0        | 30.7               | (0.17,0.40)      |    |
| Exciplex hosts     | <i>m</i> CBP:PO-T2T  | -           | 79.6        | 34.1        | -                  | 30               |    |
|                    | <i>m</i> CP:B3PYMPM  | 62.2        | 55.4        | 29.5        | -                  | 31               |    |
|                    | <i>m</i> CP:PO-T2T   | -           | 66.0        | 30.3        | -                  | 32               |    |
